# Large-scale fMRI dataset for the design of motor-based Brain-Computer Interfaces

Magnus S Bom\*, Annette MA Brak\*, Mathijs Raemaekers, Nick F Ramsey, Mariska J Vansteensel and Mariana P Branco<sup>+</sup>

Department of Neurology and Neurosurgery, UMC Utrecht Brain Center, University of Utrecht, the Netherlands

\* These authors contributed equally to this work.

<sup>+</sup> **Corresponding author:** M. P. Branco

Department of Neurology and Neurosurgery,  
UMC Utrecht Brain Center,  
University Medical Center Utrecht,  
Mailing address BCI, Str 4.205  
P.O. Box 85060, 3508 AB Utrecht  
the Netherlands.  
Email: [m.pedrosobranco@umcutrecht.nl](mailto:m.pedrosobranco@umcutrecht.nl)

## **Abstract**

Functional Magnetic Resonance Imaging (fMRI) data is commonly used to localise implantation sites for intracranial-based Brain-Computer Interfaces (BCIs). Functional data recorded during sensory and motor tasks from both adults and children specifically designed to map and localise BCI target areas is rare. Here, we describe a large-scale dataset collected from 155 human subjects during motor and sensory tasks involving the fingers, hands, arms, feet, legs, and mouth region. The dataset includes data from both adults and children (age range: 6-89 years) performing a restricted set of standardized tasks. This dataset is particularly relevant to study developmental patterns in motor representation on the cortical surface and for the design of paediatric motor-based implanted BCIs.

**Keywords:** fMRI, Dataset, Children, Life-span, Sensory, Motor, Brain-Computer Interface

## 1. Introduction

Brain Computer Interfaces (BCIs) are devices that can convert brain signals to commands on a computer, providing, for example, severely paralysed individuals with capabilities they have lost due to their paralysis. Specifically, communication BCIs (cBCIs) aim to address (complete) loss of communication (**Nicolas-Alonso & Gomez-Gil, 2012**). For implanted cBCIs using electrocorticography (ECoG) electrodes are placed on top of the cortex (e.g., **Angrick et al., 2024; Metzger et al., 2023; Vansteensel et al., 2016**), and the precise identification of cortical areas that can be targeted to drive the BCI prior to implantation is crucial for optimal performance. Functional magnetic resonance imaging (fMRI) is a common tool for this identification due to its non-invasive properties, its high spatial resolution, and high correlation with BCI performance (**Hermes et al., 2012; Leinders et al., 2023; Piantoni et al., 2021; van den Boom et al., 2021**).

For BCIs that are controlled by motor movements, signals are usually extracted from the primary sensorimotor cortex (SMC). Within the SMC, common areas for extraction of a signal are the hand, mouth, and foot areas. To activate these areas, simple motor movements (such as finger tapping) can be performed. Many studies have investigated activation patterns in healthy young adults during simple motor tasks using the hands or fingers. Such tasks have been found to robustly activate the hand and finger area of the SMC (e.g., **Witt et al., 2008**). These findings extend into aging populations (e.g., **Hutchinson, 2002, Ward et al., 2008**), providing a good basis for motor based BCI use in adults.

However, motor based BCIs could also potentially be used to help children with severe communication impairment due to Cerebral Palsy. Indeed, implanted BCIs in children is an emerging subfield of BCIs (e.g., **Kinney-Lang et al., 2016, 2020; Orlandi et al., 2021; Bergeron et al., 2023**). Yet, implementing BCIs in children poses challenges separate from those in adults. For example, little research has been dedicated to identifying developmental changes in primary motor cortex (M1) activation from childhood into adulthood. Studies that have investigated differences in M1 activation between children and adults have all shown consistent activation of the contralateral SMC in children (e.g., **Rivkin et al., 2003, Guzzetta et al., 2007**) but there may be differences in activation patterns that could have implications for the design of implanted paediatric BCIs. For example, implanting electrodes at a site that can drive a BCI during childhood but cannot sustain the use

of the BCI into adulthood would require re-insertion of an electrode grid at an older age, increasing the amount of surgery needed for the BCI.

While large fMRI datasets are widely available (e.g., **Crotti et al., 2023**), there are to our knowledge few available datasets that use motor tasks that can be used to map and localise motor and sensory areas for BCI control, and of which the motor output is not used merely as a metric of attention (e.g., button pressing). fMRI datasets are also available for both children (e.g., **Wang et al., 2022**) and adults (e.g., **Peelle et al., 2023**). However, datasets commonly include data either from children or adults, and thus might not provide data from the same tasks from both adults and children, causing difficulty of comparison between age groups.

Here we present the first large-scale fMRI dataset of 155 children and adults performing a standardized set of motor and sensory tasks. The dataset includes 471 runs involving the hand and fingers, but also a large proportion of tongue movements, as well as other limbs, like the arms or legs. By making this dataset publicly available, we hope to promote research related to the feasibility of implanted BCIs in children and young adults, allowing researchers to address gaps in the literature related to motor development from childhood into adulthood relevant to BCI control in children.

## 2. Participants

The dataset was obtained from several previous studies performed at the University Medical Centre Utrecht over the last 15 years. Data was collected from 155 participants (mean age:  $35.5 \pm 21.3$ , range: 6-89, 49.7% (78) females, 88.5% (139) right-handed and 1.9% (3) ambidextrous, **Table 1**) who performed 471 tasks in total. Some participants (N = 63) were admitted to the hospital for diagnostic procedures related to their medication-resistant epilepsy (N = 60) or surgical removal of a tumour (N = 3, sub-16, -21 and -38). As part of the pre-surgical workup, these patients underwent fMRI recordings and participated in fMRI motor experiments for clinical or research purposes. Other participants were healthy volunteers (N = 92). All participants gave their written informed consent to participate in the research for which data was acquired. For participants under the age of 18, the informed consent was obtained from the participant's parents and/or legal guardian. If they were older than 12, these participants also signed an informed consent. Given that the data is fully anonymous (defaced, randomized and without key) and shared using the BIDS format (<https://bids.neuroimaging.io/>, **Gorgolewski et al., 2016**), no extra consent was required for the public sharing of the data.

**Table 1 - Demographics.** Information about the subject's ID number, sex (F=female, M=male), handedness (R=right hand, L=left hand), type of hand movement performed (fingers=fingertapping or multiple individual fingers; hand=open/close hand or sensory stimulation, feet= both feet simultaneously) or other body parts, as well as the body side (R=right, L=left).

| SUB-ID | SEX | HANDEDNESS | HAND                                        | OTHER BODY PARTS |
|--------|-----|------------|---------------------------------------------|------------------|
| 1      | M   | R          |                                             | mouth            |
| 2      | F   | R          | L fingers                                   | L foot           |
| 3      | F   | R          | R fingers, hand                             |                  |
| 4      | M   | R          | R fingers, hand                             | tongue           |
| 5      | M   | R          | R fingers, hand                             |                  |
| 6      | M   | L          | L fingers                                   |                  |
| 7      | M   | R          |                                             | tongue           |
| 8      | M   | R          | R fingers, hand                             |                  |
| 9      | F   | R          | R fingers                                   | tongue           |
| 10     | F   | R          | R thumb finger, little finger               | tongue           |
| 11     | F   | R          | R fingers, hand                             |                  |
| 12     | F   | R          |                                             | tongue           |
| 13     | M   | L          | R thumb finger, hand                        | tongue           |
| 14     | M   | R          | R fingers, hand                             |                  |
| 15     | F   | R          | R thumb finger                              |                  |
| 16     | M   | L          |                                             | mouth            |
| 17     | F   | R          | R fingers, hand                             |                  |
| 18     | M   | R          | R thumb finger, index finger, little finger | R foot           |
| 19     | F   | R          | R fingers                                   |                  |

|    |   |   |                                                            |              |
|----|---|---|------------------------------------------------------------|--------------|
| 20 | F | R | R fingers                                                  |              |
| 21 | F | L | R fingers                                                  |              |
| 22 | F | R | R fingers                                                  | tongue       |
| 23 | F | R | R fingers                                                  | R foot       |
| 24 | F | R | L thumb finger, index finger, little finger, fingers       | tongue       |
| 25 | F | R | R fingers                                                  |              |
| 26 | F | R |                                                            | tongue       |
| 27 | M | R | R fingers                                                  |              |
| 28 | F | R | L fingers                                                  | L foot       |
| 29 | F | R | R thumb finger                                             | tongue       |
| 30 | M | R | R fingers, hand                                            | arm, R foot  |
| 31 | M | R | R fingers                                                  | tongue       |
| 32 | M | R | R fingers                                                  |              |
| 33 | M | R | R fingers                                                  | R foot       |
| 34 | F | R | R fingers                                                  |              |
| 35 | M | A | L thumb finger, index finger, little finger                |              |
| 36 | M | R | L thumb finger, index finger                               | L foot       |
| 37 | M | L | R fingers                                                  |              |
| 38 | F | R | L fingers                                                  |              |
| 39 | F | A | L thumb finger, little finger                              |              |
| 40 | F | R | R fingers, hand                                            |              |
| 41 | M | R | R fingers, hand                                            |              |
| 42 | M | R | R fingers, hand                                            |              |
| 43 | M | R |                                                            | tongue       |
| 44 | F | R |                                                            | tongue       |
| 45 | M | R | L fingers, hand                                            | arm          |
| 46 | M | R |                                                            | tongue       |
| 47 | F | R | R fingers                                                  |              |
| 48 | M | R |                                                            | R foot       |
| 49 | F | L | L fingers, hand                                            | arm, L foot  |
| 50 | M | R | R fingers                                                  | tongue       |
| 51 | F | R | R fingers, hand                                            |              |
| 52 | F | L |                                                            | tongue       |
| 53 | F | L | R fingers                                                  | tongue       |
| 54 | M | R | R fingers                                                  | tongue       |
| 55 | M | R |                                                            | tongue       |
| 56 | M | L | L fingers, hand                                            |              |
| 57 | M | R |                                                            | mouth        |
| 58 | M | R | L fingers                                                  | tongue       |
| 59 | M | R | L thumb finger, index finger, little finger, fingers, hand | tongue       |
| 60 | M | R | R thumb finger, little finger, index finger                |              |
| 61 | F | R | R thumb finger, index finger, fingers, hand                | tongue       |
| 62 | M | R | L fingers                                                  | R foot       |
| 63 | F | R | R fingers, hand                                            |              |
| 64 | F | R | R fingers, hand                                            |              |
| 65 | F | L | R fingers                                                  |              |
| 66 | F | R | R fingers                                                  |              |
| 67 | M | R | R fingers                                                  |              |
| 68 | M | L | L fingers                                                  |              |
| 69 | M | A | R fingers, hand                                            | tongue       |
| 70 | M | L | R fingers, hand                                            |              |
| 71 | F | R | R fingers, hand                                            |              |
| 72 | M | R | R fingers                                                  |              |
| 73 | M | R | L thumb finger, index finger, little finger, fingers, hand |              |
| 74 | F | R | L thumb finger                                             |              |
| 75 | F | R | R fingers, hand                                            |              |
| 76 | M | R | R fingers                                                  |              |
| 77 | M | R | L fingers                                                  | tongue       |
| 78 | F | L | L fingers, hand                                            |              |
| 79 | M | R | L+R fingers                                                | tongue, feet |
| 80 | F | R | L+R fingers                                                | tongue, feet |

|     |   |   |             |              |
|-----|---|---|-------------|--------------|
| 81  | F | R | L+R fingers | tongue, feet |
| 82  | F | R | L+R fingers | tongue, feet |
| 83  | M | R | L+R fingers | tongue, feet |
| 84  | M | R | L+R fingers | tongue, feet |
| 85  | F | R | L+R fingers | tongue, feet |
| 86  | M | R | L+R fingers | tongue, feet |
| 87  | F | R | L+R fingers | tongue, feet |
| 88  | F | R | L+R fingers | tongue, feet |
| 89  | F | R | L+R fingers | tongue, feet |
| 90  | F | R | L+R fingers | tongue, feet |
| 91  | M | R | L+R fingers | tongue, feet |
| 92  | F | R | L+R fingers | tongue, feet |
| 93  | M | R | L+R fingers | tongue, feet |
| 94  | F | R | L+R fingers | tongue, feet |
| 95  | M | R | L+R fingers | tongue, feet |
| 96  | F | R | L+R fingers | tongue, feet |
| 97  | F | R | L+R fingers | tongue, feet |
| 98  | M | R | L+R fingers | tongue, feet |
| 99  | F | R | L+R fingers | tongue, feet |
| 100 | F | R | L+R fingers | tongue, feet |
| 101 | F | R | L+R fingers | tongue, feet |
| 102 | F | R | L+R fingers | tongue, feet |
| 103 | M | R | L+R fingers | tongue, feet |
| 104 | F | R | L+R fingers | tongue, feet |
| 105 | M | R | L+R fingers | tongue, feet |
| 106 | M | R | L+R fingers | tongue, feet |
| 107 | M | R | L+R fingers | tongue, feet |
| 108 | M | R | L+R fingers | tongue, feet |
| 109 | F | R | L+R fingers | tongue, feet |
| 110 | M | R | L+R fingers | tongue, feet |
| 111 | F | R | L+R fingers | tongue, feet |
| 112 | M | R | L+R fingers | tongue, feet |
| 113 | M | R | L+R fingers | tongue, feet |
| 114 | M | R | L+R fingers | tongue, feet |
| 115 | F | R | L+R fingers | tongue, feet |
| 116 | F | R | L+R fingers | tongue, feet |
| 117 | F | R | L+R fingers | tongue, feet |
| 118 | F | R | L+R fingers | tongue, feet |
| 119 | M | R | L+R fingers | tongue, feet |
| 120 | M | R | L+R fingers | tongue, feet |
| 121 | F | R | L+R fingers | tongue, feet |
| 122 | F | R | L+R fingers | tongue, feet |
| 123 | M | R | L+R fingers | tongue, feet |
| 124 | M | R | L+R fingers | tongue, feet |
| 125 | M | R | L+R fingers | tongue, feet |
| 126 | F | R | L+R fingers | tongue, feet |
| 127 | M | R | L+R fingers | tongue, feet |
| 128 | F | R | L+R fingers | tongue, feet |
| 129 | M | R | L+R fingers | tongue, feet |
| 130 | M | R | L+R fingers | tongue, feet |
| 131 | M | R | L+R fingers | tongue, feet |
| 132 | M | R | L+R fingers | tongue, feet |
| 133 | F | R | L+R fingers | tongue, feet |
| 134 | F | R | L+R fingers | tongue, feet |
| 135 | F | R | L+R fingers | tongue, feet |
| 136 | M | R | L+R fingers | tongue, feet |
| 137 | M | R | L+R fingers | tongue, feet |
| 138 | F | R | L+R fingers | tongue, feet |
| 139 | F | R | L+R fingers | tongue, feet |
| 140 | F | R | L+R fingers | tongue, feet |
| 141 | F | R | L+R fingers | tongue, feet |
| 142 | M | R | L+R fingers | tongue, feet |
| 143 | F | R | L+R fingers | tongue, feet |
| 144 | M | R | L+R fingers | tongue, feet |
| 145 | F | R | L+R fingers | tongue, feet |
| 146 | F | R | L+R fingers | tongue, feet |
| 147 | F | R | L+R fingers | tongue, feet |

|     |   |   |             |              |
|-----|---|---|-------------|--------------|
| 148 | M | R | L+R fingers | tongue, feet |
| 149 | F | R | L+R fingers | tongue, feet |
| 150 | F | R | L+R fingers | tongue, feet |
| 151 | F | R | L+R fingers | tongue, feet |
| 152 | M | R | L+R fingers | tongue, feet |
| 153 | M | R | L+R fingers | tongue, feet |
| 154 | M | R | L+R fingers | tongue, feet |
| 155 | M | R | L+R fingers |              |

### 3. Experimental procedures

Data was collected during one of six different standardized tasks specifically designed for localization or mapping of hands, mouth or feet (**Figure 1A**): ‘Motor2Class’, ‘Motor2ClassKids’, ‘Sensory2Class’, ‘Motor3Class’, ‘Mapping3Fingers’, and ‘Mapping5Fingers’. A total of 471 runs were acquired, of which 88.14% (416) consisted of ‘Motor2Class’. All participants completed at least one task, and some participants completed multiple tasks and/or multiple runs of the same task with multiple body parts.

#### 3.1 Motor2Class and Sensory2Class

The Motor2Class and Sensory2Class were block design tasks with two conditions: rest and active (**Figure 1A**). During the ‘rest’ condition the participant was asked to lie as still as possible while fixating at the center of a screen. During the ‘active’ condition, the participant was asked to either continuously move a specific limb (Motor2Class) or to rest while a body part would be stimulated with a brush by a researcher (Sensory2Class). For all Sensory2Class and some Motor2Class, the stimulus presentation included a black screen with blinking circles cuing active (green circle) or rest (red circle) blocks. For the majority of participants, each block lasted for 30s, with a full task consisting of 4 active blocks and 5 rest blocks for 3T and 7T scans, and 8 active blocks and 9 rest blocks for 1.5T scans. For a few Motor2Class scans (sub-9, 66 and 155), each block had varying durations (13-43s) with a full task consisting of 7 active blocks and 8 rest blocks. One participant performed 8 active blocks and 9 rest blocks, with active blocks lasting for 30s. For other participants (sub-79-154, all 3T) an alternative block-design task was used for motor localization, where pictures of body parts were depicted on a screen, in grey during rest blocks. In this design, a full task consisted of 5 active blocks and 6 rest blocks or 7 active blocks and 8 rest blocks of varying durations (8-43s and 7-44s).



During active blocks the body part that was requested to move was blinking in green. The body parts included in this dataset using the above tasks were thumb, index or little fingers, all fingers in a ‘fingertapping’ fashion (‘fingers’), hand (for sensory stimulation with brush), arm, feet (both feet simultaneously), lip, tongue and mouth (**Table 1**). The task was carried out with either the right or the left body part, except in the case of feet, lip, tongue and mouth movements.

### 3.2 Motor2ClassKids

The Motor2ClassKids is child-friendly version of the Motor2Class task (**Figure1A**). Similarly, the block design task consisted of alternating ‘rest’ and ‘active’ blocks. During the ‘rest’ condition the child was asked lay as still as possible and look at pictures of a cartoon alternating with a picture of a red ‘ball’. During the ‘active’ block, a green ‘ball’ blinked alternating with a ‘cartoon’ cuing the movement. The participant was instructed to squeeze of a rubber-bulb with the hand every time a ‘cartoon’ would appear on the screen (body part ‘hand’ in **Table 1**). Each squeeze provided feedback to the participant by displaying a coloured line around the image (i.e., the ‘cartoon’ was caught with the ‘ball’). A complete run consisted of 5 active blocks and 5 rest blocks (22-30s duration) each containing 11 ‘cartoons’ (for more details see **Vansteensel et al., 2021**).

### 3.3 Motor3Class

The Motor3Class task is an alternative block design task with three conditions: one rest and two active conditions, overtly/executed movements and imagined movements (**Figure 1A**). Each condition was cued with an instruction ‘rest’, ‘move’ or ‘imagine’, followed by a block with a blinking grey square. In the ‘rest’ condition the participant was asked to lay as still as possible while fixating on the screen. During the active conditions the participant was asked to continuously move the pre-specified limb (see **Table 1**). During the ‘move’ blocks, the participant was required execute movements overly, while during the ‘imagine’ blocks the participant imagined performing the same movements. There were a total of 10 blocks for each condition, each block consisting of 18s (for more details see **Hermes et al., 2011**). The body parts included in the dataset were either movement of all fingers in a ‘fingertapping’ fashion (‘fingers’), foot or tongue (**Table 1**). The movement or

imagination of movement involved the right or the left side of the body, except for the tongue.

### **3.4 Mapping3Fingers**

The Mapping3Fingers task mapped three individual fingers: thumb, index and little fingers while using an event related design (**Figure 1A**). Each movement consisted of two flexions of the specified finger. A black contour of a hand was displayed on a screen. The movement of the fingers was cued by highlighting the thumb, little finger or index finger in blue for 0.5s. The task consisted of 30 cues of each finger presented in randomized order with an inter-trial interval of 4.4s (for more details see **Siero et al., 2014**).

### **3.5 Mapping5Fingers**

The Mapping5Fingers, also used an event-related design to map five individual fingers (**Figure1A**): thumb, index finger, middle, ring and little fingers. In this task flexion and extension of fingers was independently cued, and fingers were individually cued. Five rectangles representing each of the five fingers were displayed on a screen. The rectangle turned white to cue finger flexion, and black to cue finger extension. Each finger was kept in the same position (flexed or extended) until the movement of that same finger was cued again. Each finger was cued 8 times during the run at 4.8s intervals, except for the first and last finger which had a longer interval of 14.4s (rest block). Participants started the experiment with an open palm (for more details see **Schellekens et al., 2018**).

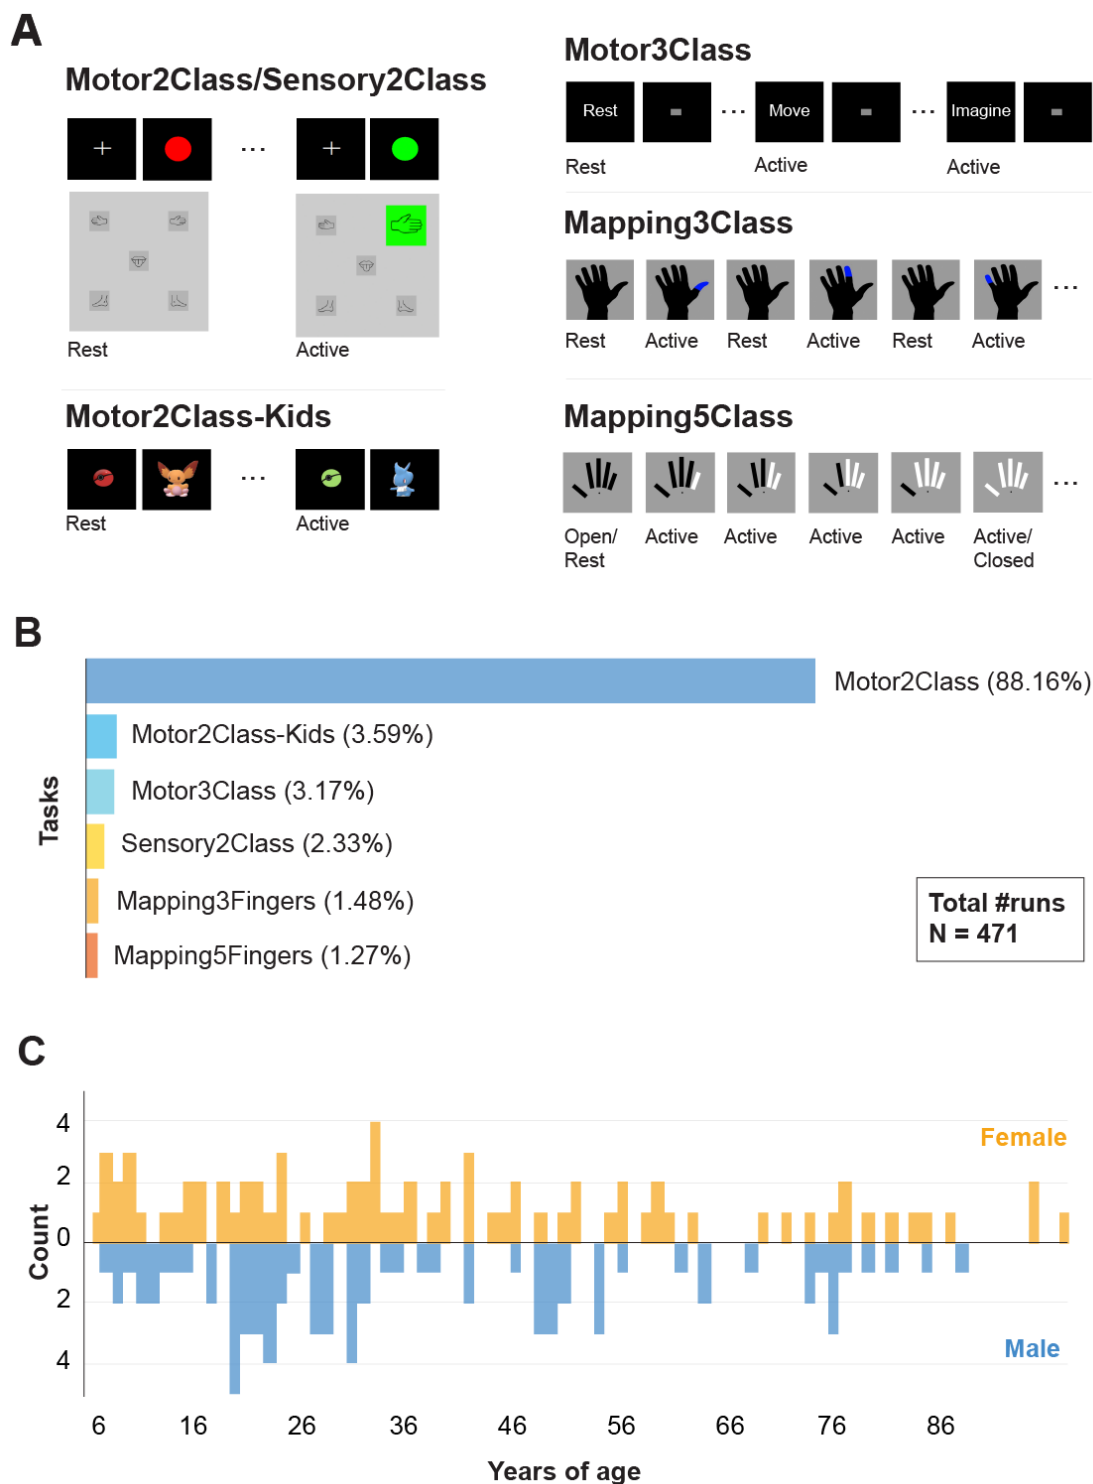

**Figure 1 – Overview of tasks and demographics.** A) Illustration of task paradigms for Motor/Sensory2Class, Motor2ClassKids, Motor3Class, Mapping3Class and Mapping5Class. A short video of each task can be found in the folder ‘task\_examples’. B) Percentage of task-related runs out of total 471 collected runs (across all participants). C) Histogram of age distribution for females (yellow) and males (blue) in the dataset.

## **4. Data acquisition details**

### **4.1 Structural data acquisition**

Structural images of the whole brain were acquired on either a 1.5T ACS-NT Philips scanner (N = 8 subjects), a 3T Achieva Philips scanner (N = 139 subjects) or a 7T Achieva Philips scanner (N = 13 subjects). Some subjects had multiple structural scans, one per session. The scanning resolution varied between 0.5 and 2 mm. The specific parameters are available for each scan in the JSON sidecar files and the NIfTI (\*.nii) file headers of the dataset.

### **4.2 fMRI data acquisition**

Functional images were acquired on either a 1.5T ACS-NT Philips scanner (N = 20 scans), a 3T Achieva Philips scanner (N = 434 scans) or a 7T Achieva Philips scanner (N = 17 scans). A PRESTO scanning sequence was used for the 1.5T scans and 3T scans (**Neggers et al., 2008**). An EPI scanning sequence was used for the 7T scans. Whole brain scans were acquired for all scans except 7T scans, where a limited field of view was used that included the top of the brain, extending ventrally to include the hand and finger area. The tasks duration varied from approximately 4.5 to 10 minutes. The acquisition time per volume ranged between 0.5 and 4.86 seconds, and the voxel size between 1.384x1.384x1.5 and 4.5x4x4 mm. The specific parameters including the scanning sequence are available for each scan in the JSON sidecar files and the NIfTI (\*.nii) file headers of the dataset.

## **5. Data standardization**

### **5.1 De-identification and defacing of structural images**

All personal identifiable information has been removed from the data. All individual structural images were defaced to comply with the requirements for sharing de-identified medical data. The images were defaced using SPM12 (<https://www.fil.ion.ucl.ac.uk/spm/>).

### **5.2 Conversion to BIDS structure**

Data was standardized using Python (version 3.9) and MATLAB (The MathWorks Inc., 2022) tools. Raw PAR/REC (f)MRI files were converted to NIfTI format using

the Nibabel library (**Brett et al., 2020**). Data was converted to Brain Imaging Data Structure (BIDS) using the function `data2bids.m` from Fieldtrip Toolbox (**Oostenveld et al., 2011**). The dataset is therefore organized according to the BIDS format (**Figure 2**): the root folder contains metadata about the description of the dataset (`dataset_description.json`), the list of participants along with their demographic details (`participants.tsv`), a folder with task examples (`task_examples`), and individual data folders per participant named `sub-XXX`. The order in which subjects were saved in the dataset was randomised and the randomisation key has been deleted, making this dataset fully anonymous. The dataset was validated using <https://bids-standard.github.io/bids-validator/>.

### 5.3 Participant data folders

Each subject's folder contains one or two sub-directories depending on how many scanning sessions the subject participated in (**Figure 2**), typically corresponding to the field strength of the MRI scanner used during the session (`ses-1.5T`, `ses-3T`, or `ses-7T`). Some subjects performed two sessions at 1.5T, and so the folders were referred to `ses-1.5T` and `ses-1.5T2`, for session 1 and 2 respectively.

### 5.4 (f)MRI folders

Inside each session folder, there are two sub-directories (**Figure 2**): a folder containing one or multiple anatomical MRI scans ('`anat`'), and a folder containing one or multiple functional MRI scans ('`func`'). Each participant has an anatomical MRI folder in at least one of their session folders. (f)MRI data are provided in the NIfTI (`*.nii`) format with sidecar JSON (`*.json`) files that store additional metadata. Functional images are accompanied by a TSV (`*events.tsv`) file that contains onsets, durations (in seconds) and the type of the events of the motor tasks.

### 5.5 Task examples folder

We additionally added a folder containing short videos of each of the five task paradigms (**Figure 2**). The videos show one of each block type for block designed tasks (`Motor2Class`, `Motor2ClassKids`, `Sensory2Class` and `Motor3Class`), and roughly 1 minute of the task for event related designs (`Mapping3Fingers` and `Mapping5Fingers`). `Motor2Class` and `Sensory2Class` share the same video, as they have the identical paradigm (see **Figure1A**).

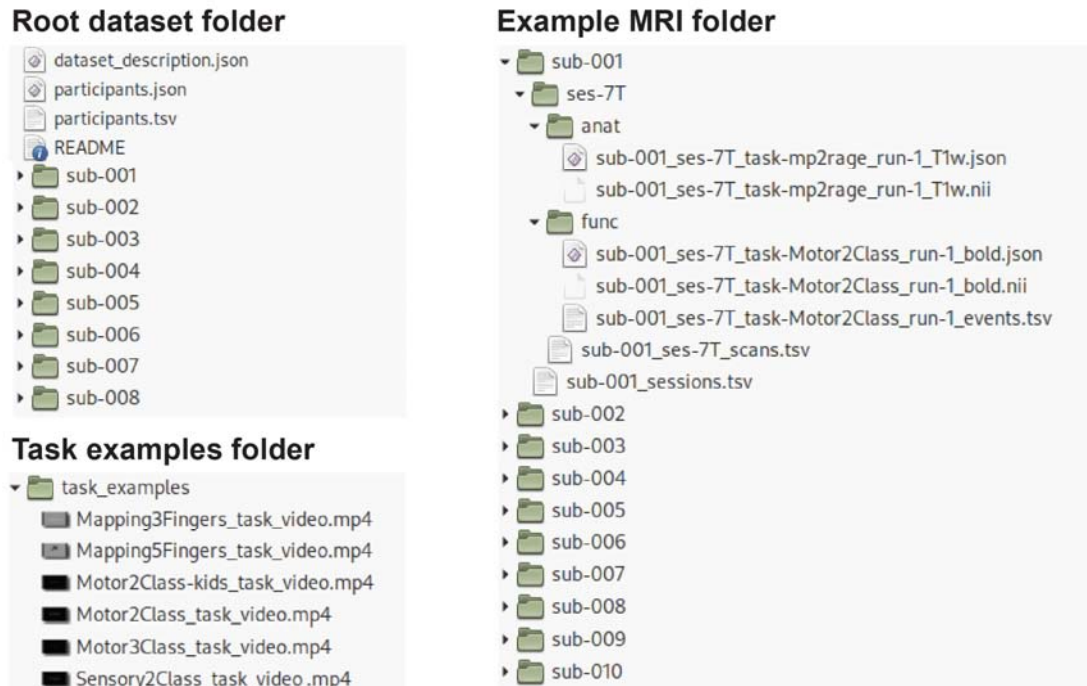

**Figure 3 – Overview of BIDS dataset.** Structure of files and sub-folders in the root dataset folder and inside subject 001 (sub-001) folder. Each subject folder contains one or more (MRI) sessions with a folder for structural ('anat') and functional ('func') data. Overview of the task example folder, where short videos of the tasks are saved.

## 6. Data pre-processing and technical validation

The data was processed with SPM12 and Freesurfer (Fischl, 2012). Preprocessing steps of functional images included, realignment, and unwarping, coregistration of the functional images to the anatomical images. Surface reconstructions of the anatomical images were created using the FreeSurfer recon-all pipeline and the functional images were mapped to the 'fsaverage' surface while using a smoothing kernel of 6 mm FWHM. Basic data quality was assessed using a 3-step approach: 1) we analysed framewise displacement; 2) we correlated activation patterns of individual scans with the mean activation pattern of other subjects that performed the same task using the same limb and performed visual inspections of the activation patterns; and 3) performed visual inspection of the activation patterns of each run. Based on these three metrics we rated each run. Data included in the dataset was deemed good. Lastly, we also performed a second-level statistic to inspect activation patterns in response to a task across all subjects.

## 6.1 Analysis of motion

Analysis of head motion involved assessment of the framewise displacement based on the transformation matrices produced by SPM during realignment and unwarping, and the raw NIfTI files. Framewise displacement for each frame relative to its previous frame. The x, y, and z displacement for each voxel and each volume was calculated based on the changes in the transformation matrices following realignment. In addition, motion outliers were calculated independently using FSL (<https://fsl.fmrib.ox.ac.uk/>) (Smith et al., 2004; Woolrich et al., 2009). This method calculates framewise displacement relative to the first volume and thresholds the displacement in order to classify outliers.

The framewise displacement analysis showed that there was a moderate amount of motion above one voxel size (**Figure 3A**). Roughly 11% of subjects had frames with a framewise displacement of more than 4 mm (the largest voxel size in the dataset), while roughly 30% of subjects had frames with a framewise displacement of more than 1.5 mm (the smallest voxel size in the dataset). In addition, analysis of outliers based on motion showed that 108 participants had more than 5% of their functional volumes marked as outliers (**Figure 3B**). Increased head motion is expected in fMRI from patient groups and children. Data of young participants may require extra processing steps, such as motion scrubbing (Power et al., 2014), Volterra expansion for general linear models (Friston et al., 1996), and independent component analysis for artifact removal (Pruim et al., 2015).

## 6.2 Correlated activation maps

The scans were grouped into four different categories for each hemisphere: hand movements and sensory stimulations from block designs, foot movements and sensory stimulations from block designs, mouth movements and sensory stimulations from block designs, and hand movements from event related designs. For each scan in each group, a mean activation map of all scans from other subjects in the same group was calculated. The activation map of each scan was then correlated with the mean activation map of the group excluding the current subject. For scans with a correlation with the mean t-map lower than 0.3, the flat surface representation of the t-activation maps. Scans without any task-related activations were removed. Scans with significant task-related activations were kept in the dataset.



### 6.3 Visual inspection of activation maps

We performed a first-level analysis (in SPM) on every run. Data were rated based on the level of noise, identified as small clusters of t-value activation strewn across the cortex, and the presence and size of clusters of activation in the SMC. Data with fewer clusters and more focal activity in the SMC was deemed good, while data with many dispersed smaller clusters and without an activation in the SMC was deemed bad. All the observed activity patterns in the dataset showed significant task-related activity and were therefore included in the dataset.

### 6.4 Response to the task

We performed a basic group-level analysis of the response to the task while including all subjects. We computed a second-level group statistic (in SPM) for the Motor2Class using 'fingers' (fingertapping) paradigm, which is the most common task and paradigm in the dataset. A general linear model was fitted to the fMRI data using the block design boxcar function (**Figure 3C**). Results of analysis overlaid on a surface representation of the fsaverage surface showed a clear bilateral activation over the hand region of the sensorimotor cortex (**Figure 3D**).

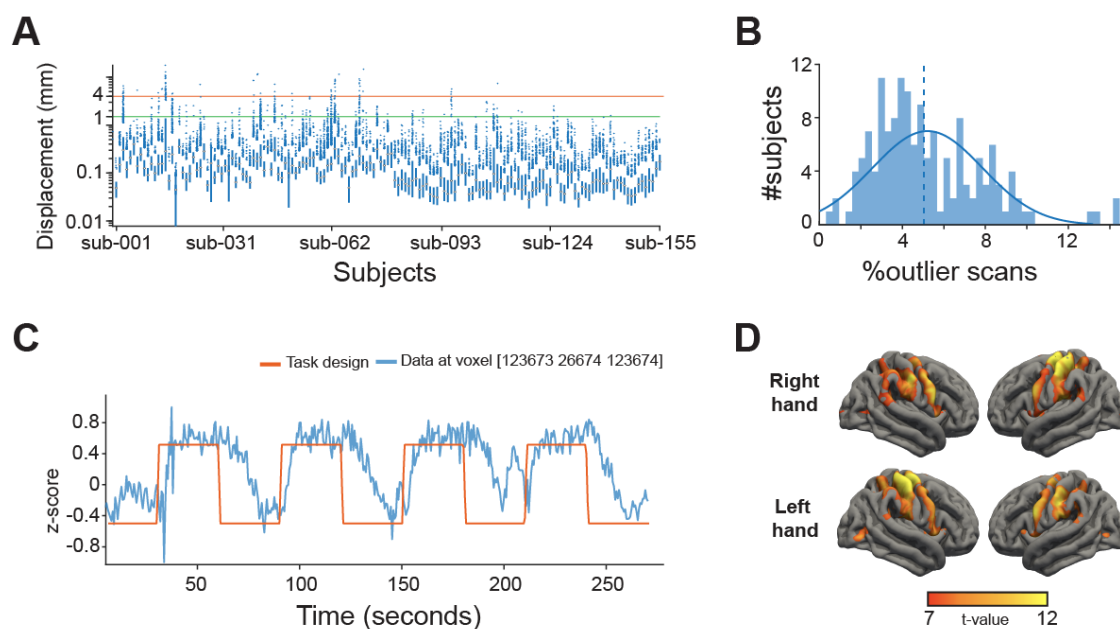



**Figure 3 – Technical data validation.** A) Boxplot of the framewise displacement metric per subject averaged over scans with maximum and minimum voxel sizes for the dataset marked by green and red horizontal lines, respectively. B) Histogram number of subjects with percentage of volumes classified as motion outliers. C) Example time course of the Motor2Class task and observed fMRI in one voxel of one subject. D) Second-level group statistics of hand movements from the Motor2Class using ‘fingers’ (fingertapping) for all subjects combined, using the t-values on the 90th percentile.

## 7. Usage Notes

Under the Public Domain Dedication and License, the data are freely available for non-commercial research purposes. Below we summarise several participant and scan notes things to keep in mind when working with this dataset:

- For hand-related tasks, handedness and the hand used during the experiment did not coincide in 12.1% (N=19) participants.
- The Mapping3Fingers and Mapping5Fingers tasks (subjects: 21, 22, 23, 25, 27, 31, 37, 38 and 67), did not include whole-brain scans, which is reflected in the curation metrics. This indicates that special care needs to be taken when dealing with these scans, to ensure that no voxels outside of the scanning area are included in the analysis. Several other subjects who Motor2Class (subject 1, 7, 15, 16, 37 and 57) also did not have whole-brain scan but covered most of the sensorimotor cortex.
- The following subjects have more than 10% motion outlier frames for all their scans (**Table 2**):
  - Subjects: 3, 7, 13, 14, 15, 17, 25, 40, 42, 46, 51, 62, 63, 70, 71, 96 and 109.
- The following subjects have frames with a higher framewise displacement than 4 mm (the largest voxel size) for all their scans (**Table 3**):
  - Subjects: 3, 7, 16, 48, 65, 67, 72.
- For subject 62, session 3T, the “imagine” condition from the Motor3Class task was used for movement of the other hemisphere instead of imagining movement. The movement condition in these files is for right hand movement while the imagine condition is for left hand movement.

**Table 2 – Subjects and scans with more than 10% motion outliers.**

| SUBJECT-ID | SESSION | TASK            | RUN |
|------------|---------|-----------------|-----|
| 7          | 7T      | Motor2Class     | 1   |
| 13         | 3T      | Sensory2Class   | 1   |
| 13         | 3T      | Motor2Class     | 2   |
| 15         | 1.5T    | Motor2Class     | 1   |
| 17         | 3T      | Motor2Class     | 1   |
| 21         | 7T      | Mapping5Fingers | 1   |
| 30         | 3T      | Motor2Class     | 3   |
| 42         | 3T      | Motor2Class     | 1   |
| 46         | 3T      | Motor2Class     | 1   |
| 63         | 3T      | Motor2ClassKids | 1   |
| 63         | 3T      | Motor2Class     | 1   |
| 64         | 3T      | Motor2ClassKids | 1   |
| 70         | 3T      | Motor2ClassKids | 1   |
| 85         | 3T      | Motor2Class     | 3   |
| 88         | 3T      | Motor2Class     | 2   |
| 93         | 3T      | Motor2Class     | 3   |
| 95         | 3T      | Motor2Class     | 4   |
| 96         | 3T      | Motor2Class     | 4   |
| 96         | 3T      | Motor2Class     | 1   |
| 98         | 3T      | Motor2Class     | 1   |
| 108        | 3T      | Motor2Class     | 3   |
| 108        | 3T      | Motor2Class     | 2   |
| 109        | 3T      | Motor2Class     | 3   |
| 116        | 3T      | Motor2Class     | 1   |
| 116        | 3T      | Motor2Class     | 2   |
| 120        | 3T      | Motor2Class     | 4   |
| 125        | 3T      | Motor2Class     | 3   |
| 126        | 3T      | Motor2Class     | 4   |
| 128        | 3T      | Motor2Class     | 4   |
| 129        | 3T      | Motor2Class     | 3   |
| 129        | 3T      | Motor2Class     | 1   |
| 129        | 3T      | Motor2Class     | 2   |
| 131        | 3T      | Motor2Class     | 4   |
| 136        | 3T      | Motor2Class     | 2   |
| 138        | 3T      | Motor2Class     | 1   |
| 142        | 3T      | Motor2Class     | 1   |
| 152        | 3T      | Motor2Class     | 1   |

**Table 3 – Subjects and scans with framewise displacement larger than 4 mm.**

| SUBJECT-ID | SESSION | TASK            | RUN |
|------------|---------|-----------------|-----|
| 3          | 3T      | Motor2Class     | 1   |
| 3          | 3T      | Motor2ClassKids | 1   |
| 7          | 7T      | Motor2Class     | 1   |
| 13         | 3T      | Sensory2Class   | 1   |
| 14         | 3T      | Motor2Class     | 1   |
| 15         | 1.5T    | Motor2Class     | 1   |
| 17         | 3T      | Motor2Class     | 1   |
| 25         | 3T      | Motor3Class     | 1   |
| 40         | 3T      | Motor2ClassKids | 1   |
| 42         | 3T      | Motor2Class     | 1   |
| 46         | 3T      | Motor2Class     | 1   |
| 51         | 3T      | Motor2Class     | 1   |
| 62         | 3T      | Motor3Class     | 1   |
| 63         | 3T      | Motor2Class     | 1   |
| 63         | 3T      | Motor2ClassKids | 1   |
| 70         | 3T      | Motor2Class     | 1   |
| 70         | 3T      | Motor2ClassKids | 1   |
| 71         | 3T      | Motor2ClassKids | 1   |
| 96         | 3T      | Motor2Class     | 4   |
| 109        | 3T      | Motor2Class     | 4   |

## 8. Code and data availability

The dataset can be downloaded from the open public repository at <https://openneuro.org/datasets/ds005366/>. Under the Public Domain Dedication and License, the data are freely available for non-commercial research purposes. The code used to produce the validation metrics are available in the public github repository: <https://github.com/UMCU-RIBS/PANDA-fmri-dataset-validation>. The 'main' function returns several tables containing framewise displacement metrics (function 'fd\_table') and motion outliers (function 'fsl\_motion\_outliers\_table'). The functional scans should be aligned and coregistered with the anatomical T1 for each subject before running the 'fd\_table' function. The function 'fsl\_motion\_outliers\_table' requires FSL to be installed and can be used without preprocessing the data. All

tables contain four columns which represent the subject number, session, task, and run. Additionally, the framewise displacement table contains an extra fifth column with framewise displacement between the current and preceding frame. Each row represents a frame in each run. The motion outliers table contains 3 additional columns, where the fifth column contains the number of frames, the sixth the number of motion outliers, and the seventh the percentage of frames categorised as motion outliers.

### **Acknowledgments**

The authors thank all participants who took the time to participate in the fMRI research conducted in our lab and included in this dataset. This research was supported by the Dutch Technology Foundation STW (PANDA project, grant 19072, MPB).

### **Contributions**

Magnus Bom: data curation, formal analysis and writing original draft. Annette Brak: data curation, formal analysis, review and editing. Mathijs Raemaekers: methodology, review and editing. Nick F Ramsey: resources, review and editing. Mariska Vansteensel: resources, review and editing. Mariana Branco: conceptualization, supervision, funding acquisition, visualization, review and editing.

### **Competing interest**

The authors declare no competing interests.

## References

- Angrick, M., Luo, S., Rabbani, Q., Candrea, D. N., Shah, S., Milsap, G. W., Anderson, W. S., Gordon, C. R., Rosenblatt, K. R., Clawson, L., Tippet, D. C., Maragakis, N., Tenore, F. V., Fifer, M. S., Hermansky, H., Ramsey, N. F., & Crone, N. E. (2024). Online speech synthesis using a chronically implanted brain–computer interface in an individual with ALS. *Scientific Reports*, *14*(1), 9617. <https://doi.org/10.1038/s41598-024-60277-2>
- Bergeron, D., Iorio-Morin, C., Bonizzato, M., Lajoie, G., Orr Gaucher, N., Racine, É., & Weil, A. G. (2023). Use of Invasive Brain-Computer Interfaces in Pediatric Neurosurgery: Technical and Ethical Considerations. *Journal of Child Neurology*, *38*(3–4), 223–238. <https://doi.org/10.1177/08830738231167736>
- Brett, M., Markiewicz, C. J., Hanke, M., Côté, M.-A., Cipollini, B., McCarthy, P., Jarecka, D., Cheng, C. P., Halchenko, Y. O., Cottaar, M., Larson, E., Ghosh, S., Wassermann, D., Gerhard, S., Lee, G. R., Wang, H.-T., Kastman, E., Kaczmarzyk, J., Guidotti, R., ... Freec84. (2020). *nipy/nibabel: 3.2.1* (3.2.1) [Computer software]. Zenodo. <https://doi.org/10.5281/ZENODO.4295521>
- Crotti, M., Koschutnig, K., & Wriessnegger, S. (2023). *The impact of handedness on the neural correlates during kinesthetic motor imagery: A fMRI study* [Dataset]. Openneuro. <https://doi.org/10.18112/OPENNEURO.DS003612.V1.0.3>
- Fischl, B. (2012). FreeSurfer. *NeuroImage*, *62*(2), 774–781. <https://doi.org/10.1016/j.neuroimage.2012.01.021>
- Friston, K. J. (2011). *Statistical parametric mapping: The analysis of functional brain images*. Academic Press.
- Friston, K. J., Williams, S., Howard, R., Frackowiak, R. S. J., & Turner, R. (1996). Movement-Related effects in fMRI time-series: Movement Artifacts in fMRI. *Magnetic Resonance in Medicine*, *35*(3), 346–355. <https://doi.org/10.1002/mrm.1910350312>
- Gorgolewski, K. J., Auer, T., Calhoun, V. D., Craddock, R. C., Das, S., Duff, E. P., Flandin, G., Ghosh, S. S., Glatard, T., Halchenko, Y. O., Handwerker, D. A., Hanke, M., Keator, D., Li, X., Michael, Z., Maumet, C., Nichols, B. N., Nichols, T. E., Pellman, J., ... Poldrack, R. A. (2016). The brain imaging data structure, a format for organizing and describing outputs of neuroimaging experiments. *Scientific Data*, *3*(1), 160044. <https://doi.org/10.1038/sdata.2016.44>
- Guzzetta, A., Staudt, M., Petacchi, E., Ehlers, J., Erb, M., Wilke, M., Krägeloh-Mann, I., & Cioni, G. (2007). Brain Representation of Active and Passive Hand Movements in Children. *Pediatric Research*, *61*(4), 485–490. <https://doi.org/10.1203/pdr.0b013e3180332c2e>
- Hermes, D., Miller, K. J., Vansteensel, M. J., Aarnoutse, E. J., Leijten, F. S. S., & Ramsey, N. F. (2012). Neurophysiologic correlates of fMRI in human motor cortex. *Human Brain Mapping*, *33*(7), 1689–1699. <https://doi.org/10.1002/hbm.21314>
- Hermes, D., Vansteensel, M. J., Albers, A. M., Bleichner, M. G., Benedictus, M. R., Mendez Orellana, C., Aarnoutse, E. J., & Ramsey, N. F. (2011). Functional MRI-based identification of brain areas involved in motor imagery for implantable brain–computer interfaces. *Journal of Neural Engineering*, *8*(2), 025007. <https://doi.org/10.1088/1741-2560/8/2/025007>
- Hutchinson, S. (2002). Age-Related Differences in Movement Representation. *NeuroImage*, *17*(4), 1720–1728. <https://doi.org/10.1006/nimg.2002.1309>
- Kinney-Lang, E., Auyeung, B., & Escudero, J. (2016). Expanding the (kaleido)scope: Exploring current literature trends for translating electroencephalography (EEG) based brain–computer interfaces for motor rehabilitation in children. *Journal of Neural Engineering*, *13*(6), 061002. <https://doi.org/10.1088/1741-2560/13/6/061002>

- Kinney-Lang, E., Kelly, D., Floreani, E. D., Jadavji, Z., Rowley, D., Zewdie, E. T., Anaraki, J. R., Bahari, H., Beckers, K., Castelane, K., Crawford, L., House, S., Rauh, C. A., Michaud, A., Mussi, M., Silver, J., Tuck, C., Adams, K., Andersen, J., ... Kirton, A. (2020). Advancing Brain-Computer Interface Applications for Severely Disabled Children Through a Multidisciplinary National Network: Summary of the Inaugural Pediatric BCI Canada Meeting. *Frontiers in Human Neuroscience*, *14*, 593883. <https://doi.org/10.3389/fnhum.2020.593883>
- Leinders, S., Vansteensel, M. J., Piantoni, G., Branco, M. P., Freudenburg, Z. V., Gebbink, T. A., Pels, E. G. M., Raemaekers, M. A. H., Schippers, A., Aarnoutse, E. J., & Ramsey, N. F. (2023). Using fMRI to localize target regions for implanted brain-computer interfaces in locked-in syndrome. *Clinical Neurophysiology*, *155*, 1–15. <https://doi.org/10.1016/j.clinph.2023.08.003>
- Ma, S., Taicheng Huang, Yukun Qu, Xiayu Chen, Yajie Zhang, & Zonglei Zhen. (2022). *WholebodySomatotopicMapping* [Dataset]. Openneuro. <https://doi.org/10.18112/OPENNEURO.DS004044.V2.0.3>
- Metzger, S. L., Littlejohn, K. T., Silva, A. B., Moses, D. A., Seaton, M. P., Wang, R., Dougherty, M. E., Liu, J. R., Wu, P., Berger, M. A., Zhuravleva, I., Tu-Chan, A., Ganguly, K., Anumanchipalli, G. K., & Chang, E. F. (2023). A high-performance neuroprosthesis for speech decoding and avatar control. *Nature*, *620*(7976), 1037–1046. <https://doi.org/10.1038/s41586-023-06443-4>
- Neggers, S. F. W., Hermans, E. J., & Ramsey, N. F. (2008). Enhanced sensitivity with fast three-dimensional blood-oxygen-level-dependent functional MRI: Comparison of SENSE–PRESTO and 2D-EPI at 3 T. *NMR in Biomedicine*, *21*(7), 663–676. <https://doi.org/10.1002/nbm.1235>
- Nicolas-Alonso, L. F., & Gomez-Gil, J. (2012). Brain Computer Interfaces, a Review. *Sensors*, *12*(2), 1211–1279. <https://doi.org/10.3390/s120201211>
- Oostenveld, R., Fries, P., Maris, E., & Schoffelen, J.-M. (2011). FieldTrip: Open Source Software for Advanced Analysis of MEG, EEG, and Invasive Electrophysiological Data. *Computational Intelligence and Neuroscience*, *2011*, 1–9. <https://doi.org/10.1155/2011/156869>
- Orlandi, S., House, S. C., Karlsson, P., Saab, R., & Chau, T. (2021). Brain-Computer Interfaces for Children With Complex Communication Needs and Limited Mobility: A Systematic Review. *Frontiers in Human Neuroscience*, *15*, 643294. <https://doi.org/10.3389/fnhum.2021.643294>
- Peelle JE, Spehar B, MS, J., McConkey S, Myerson J, S, H., Sommers MS, & Tye-Murray N. (2023). *Visual and audiovisual speech perception associated with increased functional connectivity between sensory and motor regions* [Dataset]. Openneuro. <https://doi.org/10.18112/OPENNEURO.DS003717.V1.1.0>
- Piantoni, G., Hermes, D., Ramsey, N., & Petridou, N. (2021). Size of the spatial correlation between ECoG and fMRI activity. *NeuroImage*, *242*, 118459. <https://doi.org/10.1016/j.neuroimage.2021.118459>
- Power, J. D., Mitra, A., Laumann, T. O., Snyder, A. Z., Schlaggar, B. L., & Petersen, S. E. (2014). Methods to detect, characterize, and remove motion artifact in resting state fMRI. *NeuroImage*, *84*, 320–341. <https://doi.org/10.1016/j.neuroimage.2013.08.048>
- Pruim, R. H. R., Mennes, M., Van Rooij, D., Llera, A., Buitelaar, J. K., & Beckmann, C. F. (2015). ICA-AROMA: A robust ICA-based strategy for removing motion artifacts from fMRI data. *NeuroImage*, *112*, 267–277. <https://doi.org/10.1016/j.neuroimage.2015.02.064>

- Rivkin, M. J., Vajapeyam, S., Hutton, C., Weiler, M. L., Hall, E. K., Wolraich, D. A., Yoo, S. S., Mulkern, R. V., Forbes, P. W., Wolff, P. H., & Waber, D. P. (2003). A functional magnetic resonance imaging study of paced finger tapping in children. *Pediatric Neurology*, *28*(2), 89–95. [https://doi.org/10.1016/S0887-8994\(02\)00492-7](https://doi.org/10.1016/S0887-8994(02)00492-7)
- Schellekens, W., Petridou, N., & Ramsey, N. F. (2018). Detailed somatotopy in primary motor and somatosensory cortex revealed by Gaussian population receptive fields. *NeuroImage*, *179*, 337–347. <https://doi.org/10.1016/j.neuroimage.2018.06.062>
- Siero, J. C. W., Hermes, D., Hoogduin, H., Luijten, P. R., Ramsey, N. F., & Petridou, N. (2014). BOLD matches neuronal activity at the mm scale: A combined 7T fMRI and ECoG study in human sensorimotor cortex. *NeuroImage*, *101*, 177–184. <https://doi.org/10.1016/j.neuroimage.2014.07.002>
- Smith, S. M., Jenkinson, M., Woolrich, M. W., Beckmann, C. F., Behrens, T. E. J., Johansen-Berg, H., Bannister, P. R., De Luca, M., Drobnjak, I., Flitney, D. E., Niazy, R. K., Saunders, J., Vickers, J., Zhang, Y., De Stefano, N., Brady, J. M., & Matthews, P. M. (2004). Advances in functional and structural MR image analysis and implementation as FSL. *NeuroImage*, *23*, S208–S219. <https://doi.org/10.1016/j.neuroimage.2004.07.051>
- van den Boom, M. A., Miller, K. J., Ramsey, N. F., & Hermes, D. (2021). Functional MRI based simulations of ECoG grid configurations for optimal measurement of spatially distributed hand-gesture information. *Journal of Neural Engineering*, *18*(2). <https://doi.org/10.1088/1741-2552/abda0d>
- Vansteensel, M. J., Pels, E. G. M., Bleichner, M. G., Branco, M. P., Denison, T., Freudenburg, Z. V., Gosselaar, P., Leinders, S., Ottens, T. H., Van Den Boom, M. A., Van Rijen, P. C., Aarnoutse, E. J., & Ramsey, N. F. (2016). Fully Implanted Brain–Computer Interface in a Locked-In Patient with ALS. *New England Journal of Medicine*, *375*(21), 2060–2066. <https://doi.org/10.1056/NEJMoa1608085>
- Vansteensel, M. J., Selten, I. S., Charbonnier, L., Berezutskaya, J., Raemaekers, M. A. H., Ramsey, N. F., & Wijnen, F. (2021). Reduced brain activation during spoken language processing in children with developmental language disorder and children with 22q11.2 deletion syndrome. *Neuropsychologia*, *158*, 107907. <https://doi.org/10.1016/j.neuropsychologia.2021.107907>
- Wang, J., Lytle, M. N., Weiss, Y., Yamasaki, B. L., & Booth, J. R. (2022). A longitudinal neuroimaging dataset on language processing in children ages 5, 7, and 9 years old. *Scientific Data*, *9*(1), 4. <https://doi.org/10.1038/s41597-021-01106-3>
- Ward, N. S., Swayne, O. B. C., & Newton, J. M. (2008). Age-dependent changes in the neural correlates of force modulation: An fMRI study. *Neurobiology of Aging*, *29*(9), 1434–1446. <https://doi.org/10.1016/j.neurobiolaging.2007.04.017>
- Witt, S. T., Laird, A. R., & Meyerand, M. E. (2008). Functional neuroimaging correlates of finger-tapping task variations: An ALE meta-analysis. *NeuroImage*, *42*(1), 343–356. <https://doi.org/10.1016/j.neuroimage.2008.04.025>
- Woolrich, M. W., Jbabdi, S., Patenaude, B., Chappell, M., Makni, S., Behrens, T., Beckmann, C., Jenkinson, M., & Smith, S. M. (2009). Bayesian analysis of neuroimaging data in FSL. *NeuroImage*, *45*(1 Suppl), S173-186. <https://doi.org/10.1016/j.neuroimage.2008.10.055>
